# Supplementary material for: Evaluating BRCA mutation risk predictive models in a Chinese cohort in Taiwan
Source: PubMed Central journal article supplement (PMC6629692; doi:10.1038/s41598-019-46707-6), 2019-07-15
Supplement: 41598_2019_46707_MOESM1_ESM.pdf [file 41598_2019_46707_MOESM1_ESM.pdf]

# Evaluating *BRCA* mutation risk predictive models in a Chinese cohort in Taiwan

Fei-Hung Hung<sup>2†</sup>, Yong Alison Wang<sup>1,3\*†</sup>, Jih-Wei Jian<sup>2</sup>, Hung-Pin Peng<sup>2</sup>, Ling-Ling Hsieh<sup>1</sup>, Chen-Fang Hung<sup>1</sup>, Max M Yang<sup>4</sup>, An-Suei Yang<sup>2\*</sup>

<sup>1</sup>Koo Foundation Sun-Yat Sen Cancer Center, Taipei, Taiwan

<sup>2</sup>Genomic Research Center, Academia Sinica, Taipei, Taiwan

<sup>3</sup>National Yang Ming University School of Medicine, Taipei, Taiwan

<sup>4</sup>University of Cincinnati College of Medicine, Cincinnati, Ohio, U.S.A.

†Equal contribution

## Supplementary Information

Table 1S. Number of individual gene mutation carriers in the entire cohort and the three clinical subgroups

Table 2S. *BRCA* mutation carrier rates according to mutation carrier probability categories predicted by the models

**Table 1S. Number of individual gene mutation carriers in the entire cohort and the three clinical subgroups**

| Mutations detected, no (%) | All Participants | BC/OC(+)FH(+) | BC/OC(+)FH(-) | BC/OC(-)FH(+) |
|----------------------------|------------------|---------------|---------------|---------------|
|                            | N=647            | n=241         | n=262         | n=144         |
| <i>BRCA1</i> mutation      | 12 (1.9%)        | 8 (3.3%)      | 2 (0.8%)      | 2 (1.4%)      |
| <i>BRCA2</i> mutation      | 36 (5.6%)        | 17 (7.1%)     | 15 (5.7%)     | 4 (2.8%)      |
| Other HR gene mutations    | 31 (4.8%)        | 14 (5.8%)     | 10 (3.8%)     | 7 (4.9%)      |
| <i>ATM</i>                 | 9 (1.2%)         | 4 (1.7%)      | 1 (0.4%)      | 4 (2.8%)      |
| <i>BARD1</i>               | 1 (0.2%)         | 1 (0.4%)      | 0 (0%)        | 0 (0%)        |
| <i>BRIP1</i>               | 1 (0.2%)         | 1 (0.4%)      | 0 (0%)        | 0 (0%)        |
| <i>PALB2</i>               | 10 (1.5%)        | 5 (2.1%)      | 3 (1.1%)      | 2 (1.8%)      |
| <i>RAD50</i>               | 1 (0.2%)         | 1 (0.4%)      | 0 (0%)        | 0 (0%)        |
| <i>RAD51C</i>              | 3 (0.5%)         | 0 (0%)        | 2 (0.8%)      | 1 (0.7%)      |
| <i>RAD51D</i>              | 6 (0.9%)         | 2 (0.8%)      | 4 (1.5%)      | 0 (%)         |

**Table 2S. *BRCA* mutation carrier rates according to mutation carrier probability categories predicted by the models**

|                 | Category of predicted <i>BRCA1/2</i> mutation carrier probability (%) |               |              |              |              |               |
|-----------------|-----------------------------------------------------------------------|---------------|--------------|--------------|--------------|---------------|
|                 | <10%                                                                  | 10-20%        | 20-40%       | 40-60%       | 60-80%       | >80%          |
| <b>BOADICEA</b> |                                                                       |               |              |              |              |               |
| <i>BRCA1/2</i>  | 26/583 (4.5%)                                                         | 6/29 (20.7%)  | 6/19 (31.6%) | 4/7 (57.1%)  | 1/3 (33.3%)  | 5/6 (83.3%)   |
| <i>BRCA1</i>    | 2/607 (0.3%)                                                          | 0/15 (0.0%)   | 5/16 (31.3%) | 0/2 (0.0%)   | 1/3(33.3%)   | 4/4 (100.0%)  |
| <i>BRCA2</i>    | 33/628 (5.3%)                                                         | 1/13 (7.7%)   | 0/3 (0.0%)   | 2/3 (66.7%)  | 0/0 (N/A)    | 0/0 (N/A)     |
| <b>BRCAPRO</b>  |                                                                       |               |              |              |              |               |
| <i>BRCA1/2</i>  | 14/370 (3.8%)                                                         | 5/104 (4.8%)  | 5/81 (6.2%)  | 9/37 (24.3%) | 5/32 (15.6%) | 10/23 (43.5%) |
| <i>BRCA1</i>    | 1/477 (0.2%)                                                          | 1/84 (1.2%)   | 4/51 (7.8%)  | 0/19 (0.0%)  | 2/10 (20.0%) | 4/6 (66.7%)   |
| <i>BRCA2</i>    | 19/494 (3.8%)                                                         | 7/77 (9.1%)   | 8/62 (12.9%) | 1/12 (8.3%)  | 1/2 (50%)    | 0/0 (N/A)     |
| <b>Myriad</b>   |                                                                       |               |              |              |              |               |
| <i>BRCA1/2</i>  | 25/526 (4.8%)                                                         | 12/86 (14.0%) | 9/33 (27.3%) | 2/2 (100.0%) | 0/0 (N/A)    | 0/0 (N/A)     |
| <b>Penn II</b>  |                                                                       |               |              |              |              |               |
| <i>BRCA1/2</i>  | 9/239 (3.8%)                                                          | 27/345 (7.8%) | 6/53 (11.3%) | 2/4 (50.0%)  | 0/2 (0.0%)   | 4/4 (100.0%)  |
| <i>BRCA1</i>    | 4/553 (0.7%)                                                          | 2/75 (2.7%)   | 2/11 (18.2%) | 0/4 (0.0%)   | 0/0 (N/A)    | 4/4 (100.0%)  |
| <i>BRCA2</i>    | 31/611 (5.1%)                                                         | 4/32 (12.5%)  | 1/4 (25.0%)  | 0/0 (N/A)    | 0/0 (N/A)    | 0/0 (N/A)     |

N/A: not applicable
